# Supplementary material for: Identification and Functional Analysis of 1-Deoxy-D-xylulose-5-phosphate Synthase Gene in Tomatoes (Solanum lycopersicum)
Source: MDPI journal article supplement (doi:10.3390/horticulturae10030304), 2024-03-21
Supplement: s1 [file s1]

## Supplementary Figure

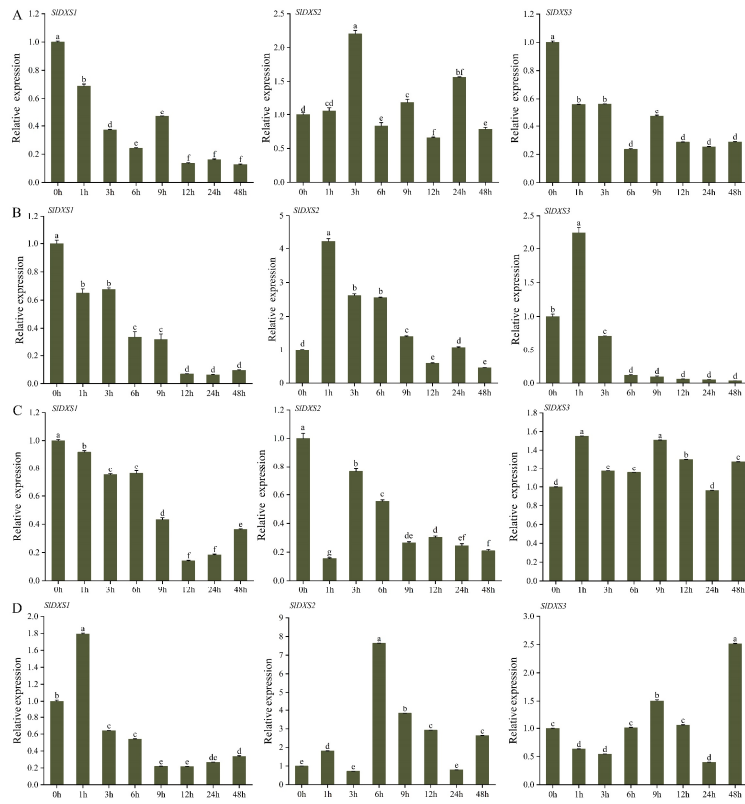

**Figure S1.** Expression patterns of tomato *DXS* gene under abiotic stress. **(A)** 100  $\mu$ M MeJA treatment. **(B)** 100  $\mu$ M GA treatment. **(C)** 100  $\mu$ M ABA treatment. **(D)** 100 mM NaCl treatment. The *Actin* gene was used as the reference gene and the expression data to RT-qPCR. Data represent the mean of triplicate with three biological replicates. Error bars were the standard errors (SE). Differential lowercase letters represented significant differences ( $P < 0.05$ ).
