# Supplementary material for: Identification and Functional Analysis of 1-Deoxy-D-xylulose-5-phosphate Synthase Gene in Tomatoes (Solanum lycopersicum)
Source: MDPI journal article supplement (doi:10.3390/horticulturae10030304), 2024-03-21
Supplement: s1 [file s1]

Archive with 2 entries (2 files):
- Supplementary Figure.pdf
- Supplementary Tables.xlsx
