# Supplementary material for: Identification and Functional Analysis of 1-Deoxy-D-xylulose-5-phosphate Synthase Gene in Tomatoes (Solanum lycopersicum)
Source: MDPI journal article supplement (doi:10.3390/horticulturae10030304), 2024-03-21
Supplement: s1 [file s1 › Supplementary Tables.xlsx]

## Sheet: S1
Table S1. Primer sequences used for RT-qPCR amplification of SlDXS
Gene ID	Forward primers (5’-3’)	Reverse primer (5’-3’)
SlDXS1	GCAGGTCTTGTTGGAGCAGATGG	TCATCAATGGCGGCAGCAGTTG
SlDXS2	AGGGCATAGTTCAACAAGCATCTCC	GTCATGGCTCCGTCTCCAATTACAG
SlDXS3	GTTGGCATGTGGAGGGCTGAAG	TGATGAAACGCACGGGAACCTTC
SlActin	GTCCTCTTCCAGCCATCCAT	ACCACTGAGCACAATGTTACCG

## Sheet: S2
Table S2. Sequences of RT-PCR primers
Gene ID	Forward primers (5’-3’)
SlDXS1-F	TAAGGTTACCGAATTCATGGCTTTGTGTGCTTATG
SlDXS1-R	AGACGCGTGAGCTCGGTACCTAGTTCATCTGCTAGTTGTTTAAGTT
SlDXS2-F	TAAGGTTACCGAATTCATGGCAGTTTCTTCAGGC
SlDXS2-R	AGACGCGTGAGCTCGGTACCAATCTCTGCTCTTAGTTCTGCA
SlDXS3-F	TAAGGTTACCGAATTCATGGTTGCTGTTACTGCTC
SlDXS3-R	AGACGCGTGAGCTCGGTACCTTCTGATCGAATTTCATTAGCTAGTTG

## Sheet: S3
Table S3. Consensus sequence of predicted SlDXS motifs in tomato
Motif	E-value	Width	Site	Best possible math
Motif 1	1.4Ee-049	50	3	PTHCGAFDVTYMACLPNMVVMAPSDEAELFHMVATAAAIDDRPSCFRYPR
Motif 2	7.6Ee-045	50	3	RCFDVGIAEQHAVTFAAGLACEGLKPFCAIYSSFLQRAYDQVVHDVDLQK
Motif 3	4.2Ee-037	50	3	TKQIGPPMHEWAAKVDEYARGMISPSGSTLFEELGLYYIGPVDGHNIEDL
Motif 4	8.2Ee-032	50	3	SSLGVVELTVALHHVFNAPZDKILWDVGHQSYAHKILTGRRDKMQTLRKT
Motif 5	2.2Ee-028	49	3	VTVADARFCKPLDADLIRSLAKNHEILITVEEGSIGGFGSHVAQFLSLD
Motif 6	3.9Ee-027	50	3	GMAVARDLKGKNNHVIAVIGDGAMTAGQAYEAMNNAGYLDSNMIVILNDN
Motif 7	3.3Ee-017	50	3	LDGPLKWRPIVLPDRYIDHGSPVDQLAVAGLTPNHIAATVLSLLGRTREA
Motif 8	2.2Ee-016	33	3	NKGIPIEVGKGRILTEGERVALLGYGSIVQNCL

## Sheet: S4
Table S4. SlDXS nucleotide sequences of tomato
Gene ID	Nucleotide Sequences
SlDXS1	ATGGCTTTGTGTGCTTATGCATTTCCTGGGATTTTGAACAGGACTGGTGTGGTTTCAGATTCTTCTAAGGCAACCCCTTTGTTCTCTGGATGGATTCATGGAACAGATCTGCAGTTTTTGTTCCAACACAAGCTTACTCATGAGGTCAAGAAAAGGTCACGTGTGGTTCAGGCTTCCTTATCAGAATCTGGAGAATACTACACACAGAGACCGCCAACGCCTATTTTGGACACTGTGAACTATCCCATTCATATGAAAAATCTGTCTCTGAAGGAACTTAAACAACTAGCAGATGAACTAAGGTCAGATACAATTTTCAATGTATCAAAGACTGGGGGTCACCTTGGCTCAAGTCTTGGTGTTGTTGAGCTGACTGTTGCTCTTCATTATGTCTTCAAT…
SlDXS2	ATGGCAGTTTCTTCAGGCACTGTATTTAGAATCAACCAGCACCCAAGTTCTCCATACATGAAAACTCCAAGATTTTACAACTTCACAAAGAAAAAATTTCTTGTAAAAGCTTCTGTGAATGGCTCAGATGAAATCAATGGGAAGATAGTAAGAAAGGAAGAAAAAGATAGTTTGCAGATTGATTTTTCAGGTGAAAAGCCACCTACACCATTTTTGGATACAATCAATTATCCTAAACATATGAAGAATCTATCAAAAATGGATCTTGAACAGTTAGCTGCAGAACTAAGAGCAGAGATTGTGTATTCAGTGGCAAAAACCGGAGGTCATTTGAGTTCAAGTTTAGGTGTTGTGGATTTAACTGTGGCTTTGCATCATGTTTTTGATACTCCTGAGGAT…
SlDXS3	ATGGTTGCTGTTACTGCTCAGTACCCATTTGGTATCTGCCCTCAGTTCCATGGGAATTCAAGGTTACTTTCCCCGGAAACGGACTTCTCTGCTCTCAATTTTCCTTACACACTGGGATATTCAAAATTGAGTCTTCACCCCAAGGGTCATGTTGCTGAAATACATTCTTTGCCACATGCTGGTGATTTCACTGGTGAAAATGAGCCAACACCAATTCTTGATGCAATTGAAAGTCCCATGAACCTAAAGAATTTATCAACCAAGGAACTGAAACAACTAGCTAATGAAATTCGATCAGAATTAGCTTTTATCATTGCAAAATCTCAAAAACCTTCAAGTTCAAGTCTGACTGTTGTGGAGCTAACTGTTGCTATTCACCATGTATTTAATGCCCCTGTG…

## Sheet: S5
Table S5. SlDXS protein sequences of tomato
Gene ID	Protein Sequences
SlDXS1	MALCAYAFPGILNRTGVVSDSSKATPLFSGWIHGTDLQFLFQHKLTHEVKKRSRVVQASLSESGEYYTQRPPTPILDTVNYPIHMKNLSLKELKQLADELRSDTIFNVSKTGGHLGSSLGVVELTVALHYVFNAPQDRILWDVGHQSYPHKILTGRRDKMSTLRQTDGLAGFTKRSESEYDCFGTGHSSTTISAGLGMAVGRDLKGRNNNVIAVIGDGAMTAGQAYEAMNNAGYLDSDMIVILNDNRQVSLPTATLDGPVAPVGALSSALSRLQSNRPLRELREVAKGVTKQIGGPMHELAAKVDEYARGMISGSGSTLFEELGLYYIGPVDGHNIDDLIAILKEVRSTKTTGPVLIHVVTEKGRGYPYAERAADKYHGVAKFDPATGKQFKASAKTQS…
SlDXS2	MAVSSGTVFRINQHPSSPYMKTPRFYNFTKKKFLVKASVNGSDEINGKIVRKEEKDSLQIDFSGEKPPTPFLDTINYPKHMKNLSKMDLEQLAAELRAEIVYSVAKTGGHLSSSLGVVDLTVALHHVFDTPEDKIIWDVGHQAYAHKILTGRRSKMHTMRKTSGLAPFPKRDESVHDAFGAGHSSTSISAGLGMAVARDLLGNNNHVISVIGDGAMTAGQAYEAMNNAGFLDSNLIVILNDNKQVSLPTATLDGPATPVGALSSALSKLQASLKFRQLREAAKTITKQIGPQAHEVAAKVDEYARGMLSASGSTLFEELGLYYIGPVDGHNIEDLITILEKVKALPAPGPVLIHIVTEKGKGYLPAEAADDKMHGVAQFDPKTGKQFKAKSPTLTYTQY…
SlDXS3	MVAVTAQYPFGICPQFHGNSRLLSPETDFSALNFPYTLGYSKLSLHPKGHVAEIHSLPHAGDFTGENEPTPILDAIESPMNLKNLSTKELKQLANEIRSELAFIIAKSQKPSSSSLTVVELTVAIHHVFNAPVDKILWDVAEQTYAHKLLTGRRQIMQALEKTNGWPVAAPDFEGGFDPFGVGHGCNSVSAGLGMAIARDLKGKRDRVVAVINNETIMAGQVYEAMRNSGYLDSNMIVILNDSRHSLHPKVEETSKTPINAFSSTLSKLQSSKLFRRFRELAKALTKKIGKGMYEWAAKVDEYARGMIGPPGSTLFEELGLYYIGPVDGHNIEDLVCVLNEVASLDSMGPVLVHVITKEELEVGDNQMNAVANKIMEGVSISDTIPYGNRTYSDCFVEA…
